# Supplementary material for: The Electrochemical Characterization of Nanostructured Bi2Se3 Thin Films in an Aqueous Na Electrolyte
Source: MDPI journal article supplement (doi:10.3390/batteries8030025), 2022-03-18
Supplement: s1 [file s1]

# The Electrochemical Characterization of Nanostructured Bi<sub>2</sub>Se<sub>3</sub> Thin Films in an Aqueous Na Electrolyte

Raimonds Meija<sup>1</sup>, Vitalijs Lazarenko<sup>1</sup>, Anna Skrastina<sup>1</sup>, Yelyzaveta Rublova<sup>1</sup>, Jana Andzane<sup>1</sup>, Vanda Voikiva<sup>1</sup>, Arturs Viksna<sup>2</sup>, and Donats Erts<sup>1,2</sup>.

<sup>1</sup> Institute of Chemical Physics, <sup>2</sup> Faculty of Chemistry, University of Latvia, Raina blvd. 19, LV-1586, Riga, Latvia

## Supplementary info

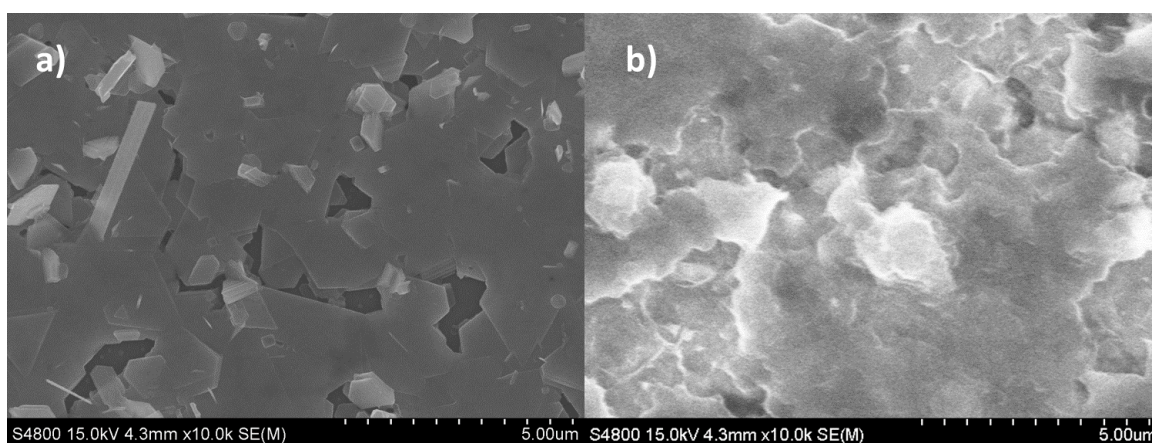

**Supplementary Figure S1.** SEM images: (a) fresh sample; (b) after 30 CV cycles at 1 mV/s scan rate.

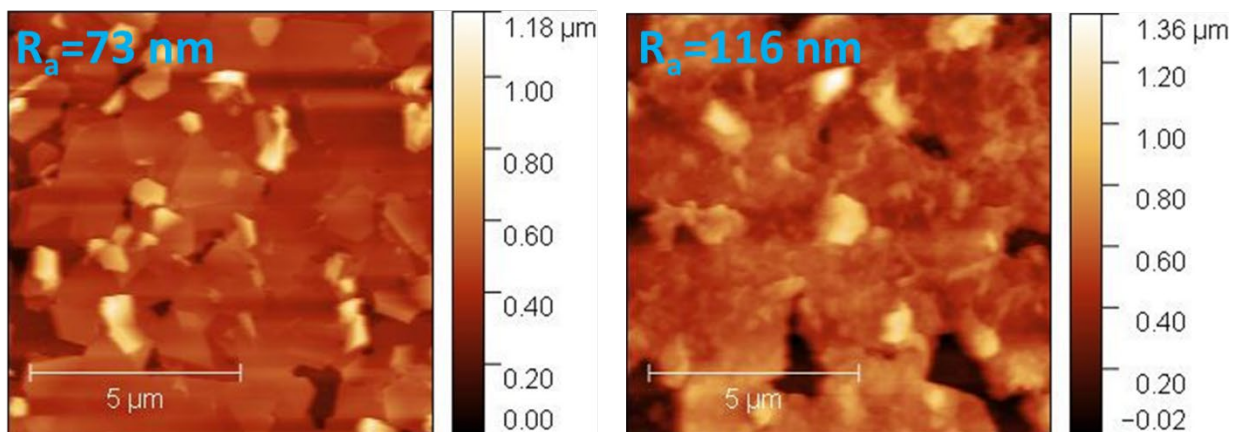

**Supplementary Figure S2.** AFM scans and  $R_a$  values for the roughness: (a) fresh sample; (b) after 30 CV cycles at 1 mV/s scan rate.

XRD spectra:

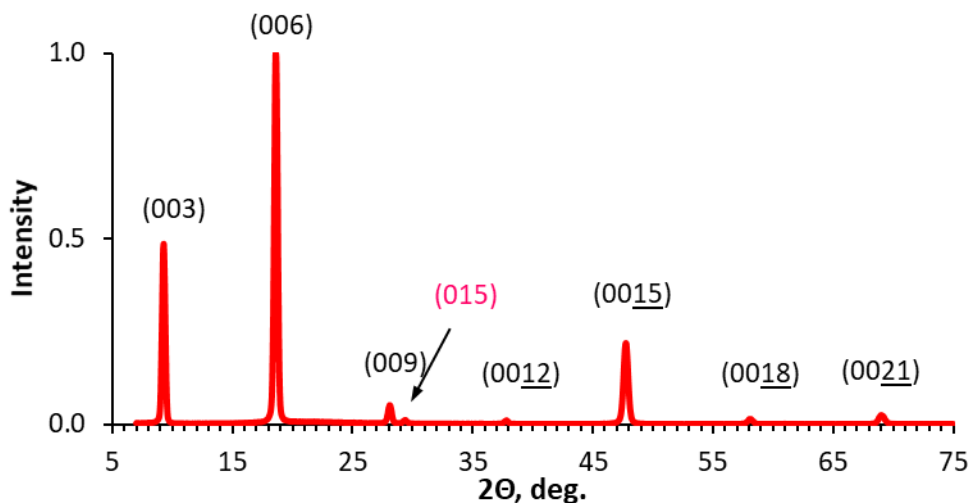

**Supplementary Figure S3.** XRD spectra of a fresh  $\text{Bi}_2\text{Se}_3$  thin film on glass. The peak (015) represents the disordered part of the  $\text{Bi}_2\text{Se}_3$  film. As its intensity is very low, it suggests that the disordered nanostructures were grown only on the top layer of the film.

A possible ASIBs battery system that could use the investigated material ( $\text{Bi}_2\text{Se}_3$  thin film) could consist of the following parts: anode ( $\text{Bi}_2\text{Se}_3$  thin films), electrolyte (1 M  $\text{NaNO}_3$ ), cathode ( $\text{MnO}_2$  or  $\text{Na}_x\text{MnO}_2$ ), and separator (solid electrolyte separator composed of NASICON-type). This system might be prepared in the coin half-cells (e.g. CR2032).

Cathode material reference link <https://doi.org/10.1016/j.mtener.2020.100432>

Separator link <https://doi.org/10.1016/j.jpowsour.2020.228950>
