# Supplementary material for: The Electrochemical Characterization of Nanostructured Bi2Se3 Thin Films in an Aqueous Na Electrolyte
Source: MDPI journal article supplement (doi:10.3390/batteries8030025), 2022-03-18
Supplement: s1 [file s1]

Archive with 1 entries (1 files):
- batteries-1577056-supplementary.pdf
